1 **SARS-CoV-2 ORF1ab<sup>A1061S</sup> potentiate autoreactive T cell responses**  
2 **via epitope mimicry: an explanation to hepatitis of unknown cause**

3 Yu Wang<sup>1,†,#</sup> and Yuexing Liu<sup>2,†,#</sup>

4 **Affiliations**

5 <sup>1</sup>Shanghai Institute of Nutrition and Health, Shanghai Institutes for Biological  
6 Sciences, University of Chinese Academy of Sciences, Chinese Academy of Sciences;  
7 Shanghai 200031, China;

8 <sup>2</sup>Guangzhou Laboratory, Guangzhou 510005, China

9 † These authors contributed equally to the work.

10 # Co-responding authors: Yu Wang ([oucwangyu@163.com](mailto:oucwangyu@163.com)); Yuexing Liu  
11 ([yancylau@163.com](mailto:yancylau@163.com))

12

13 **Abstract**

14 The World Health Organization have recently announced outbreak news of acute,  
15 severe hepatitis of unknown cause in children under a Covid-19 pandemic. Whether it  
16 is associated with severe acute respiratory syndrome coronavirus 2 (SARS-CoV-2)  
17 infection is still under debating. Here, we performed genomic sequence alignment  
18 analysis of the genome of SARS-Cov-2 (Wuhan-hu-1) to the human genome  
19 reference. Sequence analysis revealed that the SARS-CoV-2 ORF1ab<sup>1056-1173</sup>  
20 presented high identities with the human protein PAPR14<sup>53-176</sup>(3Q6Z\_A). After  
21 searching the fully sequenced SARS-CoV-2 genomes deposited in GISAID  
22 (<https://www.gisaid.org/>), we detected 170 SARS-CoV-2 variants with mutation in  
23 ORF1ab<sup>1061</sup>, where alanine (A) was substituted by serine (S). This alteration made a  
24 7-amino acid peptide (VVVNASN) in ORF1ab<sup>1056-1062</sup> identical to its counterpart in  
25 PARP14<sup>53-59</sup>(3Q6Z\_A). HLA prediction suggested that the peptides with high  
26 identities in PARP14 and ORF1ab could be presented by a same globally prevalent  
27 HLA-A\*11:01 molecule. And in consistent with the first reported case of hepatitis of  
28 unknown, SARS-CoV-2 ORF1ab<sup>VVVNASN</sup> variants were mostly identified as Delta  
29 lineages in UK by the late 2021, with an overall frequency of 0.00161%. Thus, our  
30 preliminary results raised a possibility that infection by SARS-CoV-2  
31 ORF1ab<sup>VVVNASN</sup> variant might elicit an autoimmune T cell response via epitope  
32 mimicry and is associated with the outbreak of unknown hepatitis. We anticipated that  
33 these findings will alert the human societies to pay more attention to rare mutations  
34 beyond the spike proteins.

35 **Key words**

36 **SARS-CoV-2, Hepatitis of unknown cause, Epitope mimicry, ORF1ab, A1061S**  
37 **mutation**

38

39 **Main text**

40 The severe acute respiratory syndrome coronavirus 2 (SARS-CoV-2) have caused a  
41 global pandemic in the last two years and are still evolving nowadays. Although we  
42 have made great progresses in understanding their virology and key steps of life cycle  
43 [1], long-term and systematic impacts of these virus on human are still missing,  
44 especially of that on the systemic immune status. Beside SARS-CoV-2, the World  
45 Health Organization have announced outbreak news of acute, severe hepatitis of  
46 unknown origin in children on 23, April 2022 [2]. And according to the records by  
47 European Centre for Disease Prevention and Control, the total number of cases  
48 reported worldwide were approximately 450 by 11, May 2022[3]. All of the patients  
49 were found in children under 16 years old, and it was estimated that more than 10% of  
50 the children have required liver transplantation [2].

51 The etiology of this disease is current unknown. However, some of these children  
52 have been identified with ongoing or recent SARS-CoV-2 infections in Israel and the  
53 USA [2]. Although linkes between long-lasting effects from the SARS-CoV-2  
54 infection with hepatitis of unknown origin were currently without experimental  
55 examination, a case report highlighted a possible association between SARS-CoV-2  
56 infection and subsequent development of T cell participated autoimmune liver  
57 disease[4]. In supporting, SARS-CoV-2 superantigens have been hypothesized to  
58 involve in excessive T cell activation and possibly the pathogenesis of hepatitis of  
59 unknown cause[5].

60 T cell responses are critically important to eliminate virus infection and also for  
61 SARS-CoV-2[6]. The elimination of virus finally resulted in a persistent T cell-pools  
62 that processing diverse T cell receptor (TCR) repertoires to virus related antigens,  
63 thus leaving a protection for the secondary infections by the same virus. Typically,  
64 these T cells were kept in check and did not attack human tissues. However, in some  
65 cases, virus infection led to immune disorders and caused autoimmune diseases,  
66 which were related to the disturbed peripheral tolerance[7, 8]. In the cases of SARS-  
67 CoV-2 infections, severe immune perturbations have been noted[9], thus rising  
68 possibilities that impaired peripheral T cell tolerance would occur.

69 Based on that knowledge, we hypothesized that virus mutations might generate new

70 antigens that mimicked self-peptides and elicited an autoimmune response in  
71 appropriate inflammatory microenvironments, and thus associated with the emerging  
72 of hepatitis of unknown cause.

73 **PSI-blast identified a motif with high identity between human PARP14 and**  
74 **SARS-CoV-2 ORF1ab**

75 To test the hypothesis above, we made a whole-genome alignment of SARS-CoV-2  
76 (wh-hu-1)[10] to the human reference genome with PSI-blast in default parameters.  
77 Among all the SARS-CoV-2 proteins aligned, only a hit in ORF1ab (ORF1ab<sup>1056-1173</sup>)  
78 was found, which presented high identity with a sequence in human PARP14  
79 (PARP14<sup>53-176</sup>, sequence ID: 3Q6Z\_A) (**Fig. 1A**). The most identical peptide was  
80 located in a motif with 7 amino acids residuals, in which only a differential amino  
81 acid was found in ORF1ab<sup>1061</sup> comparing to PARP14<sup>58</sup> (**Fig. 1A**). In addition,  
82 PAPR14<sup>62-75</sup>(sequence ID: 3Q6Z\_A) also shared high identity with ORF1ab<sup>1065-</sup>  
83 <sup>1078</sup>(**Fig. 1A**).

84 **Rare mutation increased identity between ORF1ab<sup>1056-1062</sup> and PARP14<sup>53-59</sup>**

85 Since the release of the first sequence of SARS-CoV-2 (wuhan-hu-1) in December  
86 2019, the virus has undergone numerous mutations. The accumulation of mutations in  
87 the genome of SARS-CoV-2 will affect functional properties and may alter  
88 infectivity, disease severity or interactions with host immunity. It was reasonable to  
89 speculate that there might be some SARS-CoV-2 variants with mutations occurring in  
90 ORF1ab<sup>1056-1062</sup>, thus resulting in an increased identity to human PARP14<sup>53-59</sup>  
91 (3Q6Z\_A). To test that hypothesis, we downloaded the proteins of SARS-CoV-2  
92 variants deposited on GISAID (<https://www.gisaid.org/>). Sequence analysis was focus  
93 on the amino acid sequence from 1055 to 1077 on ORF1a protein. Among all the  
94 SARS-CoV-2 protein sequences (10,541,935 in total, by May 10<sup>th</sup>, 2022), 170  
95 possessed an alanine (A) to serine (S) substitution on the site 1061 of ORF1ab (**Fig.**  
96 **1B and 1C**). Noteworthy, this alteration made the core amino acid sequences  
97 identical to that of human PARP14<sup>53-59</sup> (3Q6Z\_A). Further analysis revealed that  
98 SARS-CoV-2 ORF1ab<sup>VVVNASN</sup> variants has been recorded in 15 countries across 5  
99 continents (**Fig. 1B and 1C**). The variants varied by countries with an overall  
100 frequency of 0.00161% worldwide (**Fig. 1C**). In consistent with the firstly reported

101 cases of hepatitis of unknown, SARS-CoV-2 ORF1ab<sup>VVNASN</sup> variants was mostly  
102 detected in the UK (135) and the USA (18) (**Fig. 1D**).

103 In addition to ORF1ab<sup>A1061S</sup> substitution, several other mutations that would  
104 potentially increase the sequence identity were also identified. For example,  
105 ORF1ab<sup>G1073A</sup> have been emerging at a relative high frequency (**Fig. 2A, table 1**).  
106 This mutation led a 11-amino acid motif in ORF1ab (LKHGGGVAAAL) to be more  
107 similar in chemical properties, comparing to human PARP14 (LKHYGGLAAAL)  
108 (**Fig. 2A**). The 170 variants bearing A1061S mutation in ORF1ab were also annotated  
109 to the Variants of Concern (VOC) and most of mutational variants are found within  
110 SARS-CoV-2 Delta lineage (**Fig. 2B**). Although the Omicron variants were causing  
111 most of the infections globally, an Israel research group has warned that Delta  
112 variants were still undergoing circulating in parallel to Omicron variants and might  
113 maintain its circulation in future[11].

#### 114 **HLA prediction suggested potential overlaps of HLA in binding human and** 115 **virus peptides**

116 T cells recognized peptides presented by specific array of HLA molecules. Thus,  
117 HLA overlapping was a pre-determinant for cross T cell reactivities induced by  
118 epitope mimicry. We used an online HLA binding prediction tool[12]  
119 (<http://tools.iedb.org/mhci/>) to predict peptide binding abilities by a default array of  
120 MHC-I molecules, allowing to evaluate the binding potential and usage overlaps of  
121 HLA molecules by high similar peptides from human PARP14 and SARS-CoV2  
122 ORF1ab. We selected a total of 23 amino acid surrounding the identical 7-amino acid  
123 of ORF1ab<sup>A1061S</sup> and PARP14 as inputs respectively. As expected, we found that the  
124 peptide VVNASNELK in human PARP14 and VVNASNVYK in ORF1ab<sup>A1061S</sup>  
125 could be presented by a same HLA-A\*11:01 molecule with comparable high-affinity  
126 (**Fig. 2C**). Importantly, OFR1ab<sup>A1061S</sup> mutation showed increased binding ability of  
127 this peptide to HLA-A\*11:01 molecule, as comparing to its wuhan-hu-1 counterpart  
128 (**Fig. 2C**). These findings suggested both the self- and virus- peptides with high  
129 sequence identity could be presented by a same HLA molecule, supporting that  
130 specific T-cell clones restricted to an HLA-A\*11:01 molecules might be cross-  
131 activated by virus peptides mimicry and led to autoimmune responses . Indeed, HLA-  
132 A\*11:01 was one of the most prevalent HLAs across the world [8], suggesting virus

133 antigen presentation by HLA-A\*11:01 were generally applicable to the worldwide.

## 134 **Discussion**

135 Deregulated T cell responses are common triggers of various autoimmune diseases.  
136 Epitope mimicry of host proteins by pathogen is a common inducer in susceptible  
137 individuals to induce biased immune response versus tolerance, leading to tissue  
138 damage[13]. Here we found a mutation in SARS-CoV-2 ORF1ab may lead to  
139 increased identity between pathogen peptides with human proteins, providing a  
140 computational evidence for understanding the leading cause of SARS-CoV-2  
141 associated autoimmune diseases, and also provided a new thought on the outbreaks of  
142 children hepatitis of unknown cause under a background of SARS-CoV-2 pandemic.

143 The outbreak of hepatitis of unknown cause was currently restricted to children under  
144 16 years old. It should be noted that in children, their thymus output was kept in stack,  
145 T cell repertoires were continuously making, and peripheral tolerance was under  
146 establishing [14]. The disturbance of systematic and local immune microenvironment  
147 by SARS-CoV2 infection was likely to affect the establishment of normal T cell  
148 tolerances, thus possibly explained the preference of children to this type of hepatitis.  
149 Based on that, we anticipated that HLA genotyping may facilitate to uncovering the  
150 real cause of hepatitis.

151 According to the fully sequenced genomes deposited in GISAID, the frequency of  
152 SARS-CoV-2 ORF1ab<sup>VVNASN</sup> variants was around 0.0000161. Among 517,648,631  
153 confirmed SARS-CoV-2 cases by 15, May 2022 (<https://covid19.who.int/>), it was  
154 roughly estimated that 8334 people, irrespective of children or adults, might be  
155 subjected to risks of autoimmune T cell responses and possibly the hepatitis of  
156 unknown cause. However, other unknown factors may also participate to exacerbate  
157 disease morbidity and severity, and indeed we have noted some mutations will  
158 increase the sequence identity between ORF1ab<sup>1065-1078</sup> and PAPR14<sup>62-75</sup>(3Q6Z\_A).  
159 Most of the variants bearing A1061S substitution were in Delta lineage, and it should  
160 be noteworthy that Delta variants were still circulating in parallel with Omicron  
161 variants[11]. Thus, mutations in these sites should call for our great concerns.  
162 However, our results were still preliminary and we only aimed to discussing a  
163 possible association of SARS-CoV-2 infection with children acute hepatitis of

164 unknown cause. Further experimental validation of this hypothesis presented here was  
165 urgently needed to figure out the nature of hepatitis of unknown cause.

166 **Acknowledgement:**

167 We thank GISAID for collecting and sharing the sequences of SARS-CoV-2 globally.

168 **Author contributions:**

169 Both Yu Wang and Yuexing Liu contributed to the conceptional design and data  
170 processing.

171 **Conflict of interest:**

172 The authors declared no conflict of interest.

173 **Fundings and ethics:**

174 This manuscript was not funded by any sponsors. All of the data was generated from  
175 public available database and did not required ethics committee approval.

176 **References**

- 177 1. Harvey, W.T., et al., *SARS-CoV-2 variants, spike mutations and immune*  
178 *escape*. Nat Rev Microbiol, 2021. **19**(7): p. 409-424.
- 179 2. WHO, *Multi-Country – Acute, severe hepatitis of unknown origin in children*.  
180 2022.
- 181 3. ECDC, *Epidemiological update: Hepatitis of unknown aetiology in children*.  
182 2022.
- 183 4. Osborn, J., S. Szabo, and A.L. Peters, *Pediatric Acute Liver Failure Due to*  
184 *Type 2 Autoimmune Hepatitis Associated With SARS-CoV-2 Infection: A Case*  
185 *Report*. JPGN Rep, 2022. **3**(2): p. e204.
- 186 5. Brodin, P. and M. Arditi, *Severe acute hepatitis in children: investigate SARS-*  
187 *CoV-2 superantigens*. Lancet Gastroenterol Hepatol, 2022.
- 188 6. Keeton, R., et al., *T cell responses to SARS-CoV-2 spike cross-recognize*  
189 *Omicron*. Nature, 2022. **603**(7901): p. 488-492.
- 190 7. Knight, J.S., et al., *The intersection of COVID-19 and autoimmunity*. J Clin  
191 Invest, 2021. **131**(24).

- 192 8. Sollid, L.M., *Epstein-Barr virus as a driver of multiple sclerosis*. *Sci*  
193 *Immunol*, 2022. **7**(70): p. eabo7799.
- 194 9. Fox, S.E., et al., *Cardiac Endotheliitis and Multisystem Inflammatory*  
195 *Syndrome After COVID-19*. *Ann Intern Med*, 2020. **173**(12): p. 1025-1027.
- 196 10. Wu, F., et al., *A new coronavirus associated with human respiratory disease*  
197 *in China*. *Nature*, 2020. **579**(7798): p. 265-269.
- 198 11. Yaniv, K., et al., *Managing an evolving pandemic: Cryptic circulation of the*  
199 *Delta variant during the Omicron rise*. *Sci Total Environ*, 2022. **836**: p.  
200 155599.
- 201 12. Reynisson, B., et al., *NetMHCpan-4.1 and NetMHCIIpan-4.0: improved*  
202 *predictions of MHC antigen presentation by concurrent motif deconvolution*  
203 *and integration of MS MHC eluted ligand data*. *Nucleic Acids Res*, 2020.  
204 **48**(W1): p. W449-W454.
- 205 13. Davies, J.M., *Molecular mimicry: can epitope mimicry induce autoimmune*  
206 *disease?* *Immunol Cell Biol*, 1997. **75**(2): p. 113-26.
- 207 14. Deya-Martinez, A., A.M. Flinn, and A.R. Gennery, *Neonatal thymectomy in*  
208 *children-accelerating the immunologic clock?* *J Allergy Clin Immunol*, 2020.  
209 **146**(2): p. 236-243.
- 210 15. Rambaut, A., et al., *A dynamic nomenclature proposal for SARS-CoV-2*  
211 *lineages to assist genomic epidemiology*. *Nat Microbiol*, 2020. **5**(11): p. 1403-  
212 1407.  
213



214

215 **Figure legends:**

216 **Figure 1. SARS-CoV-2 ORF1ab<sup>A1061S</sup> substitution increased sequence identity**  
217 **with human PARP14 and variant's epidemiology.**

218 (A) PSI blast showing the alignment of SARS-CoV-2 ORF1ab<sup>1056-1173</sup> with  
219 PARP14<sup>53-168</sup>(3Q6Z\_A). (B) Global distribution of the fully sequenced SARS-CoV-2  
220 genomes possessing A1601S mutation in SARS-CoV-2 ORF1ab VVVNAAN motif.  
221 Basal layer map was created by BioRender.com with permission. (C) Counts (and  
222 proportions) of ORF1ab<sup>VVVNASN</sup> variants across 15 countries. (D) Monthly trends in  
223 accumulated number of ORF1ab<sup>VVVNASN</sup> variants across 15 countries.

224 **Figure 2. Sequence analysis of variants bearing ORF1ab<sup>A1061S</sup> substitution.**

225 (A) Mutation preferences and rates in SARS-CoV-2 ORF1ab<sup>1055-1079</sup> as compared to  
226 wuhan-hu-1. (B) Pie plot showing phylogenetic assignment of the SARS-CoV-2  
227 variant (ORF1ab<sup>VVVNASN</sup>) with pangolin[15]. (C) Predicted binding ability by HLA-  
228 A\*11:01 to human PARP14 and SARS-CoV-2 ORF1ab generated peptide. The MHC I  
229 binding predictions were made using the IEDB analysis resource NetMHCpan (ver.  
230 4.1) tool [12].

**Figure 1. SARS-CoV-2 ORF1ab<sup>A1061S</sup> substitution increased sequence similarities with human PARP14 and variant's epidemiology.**

bioRxiv preprint doi: <https://doi.org/10.1101/2022.05.16.491922>; this version posted May 23, 2022. The copyright holder for this preprint (which was not certified by peer review) is the author/funder, who has granted bioRxiv a license to display the preprint in perpetuity. It is made available under a [CC-BY-NC-ND 4.0 International license](#).

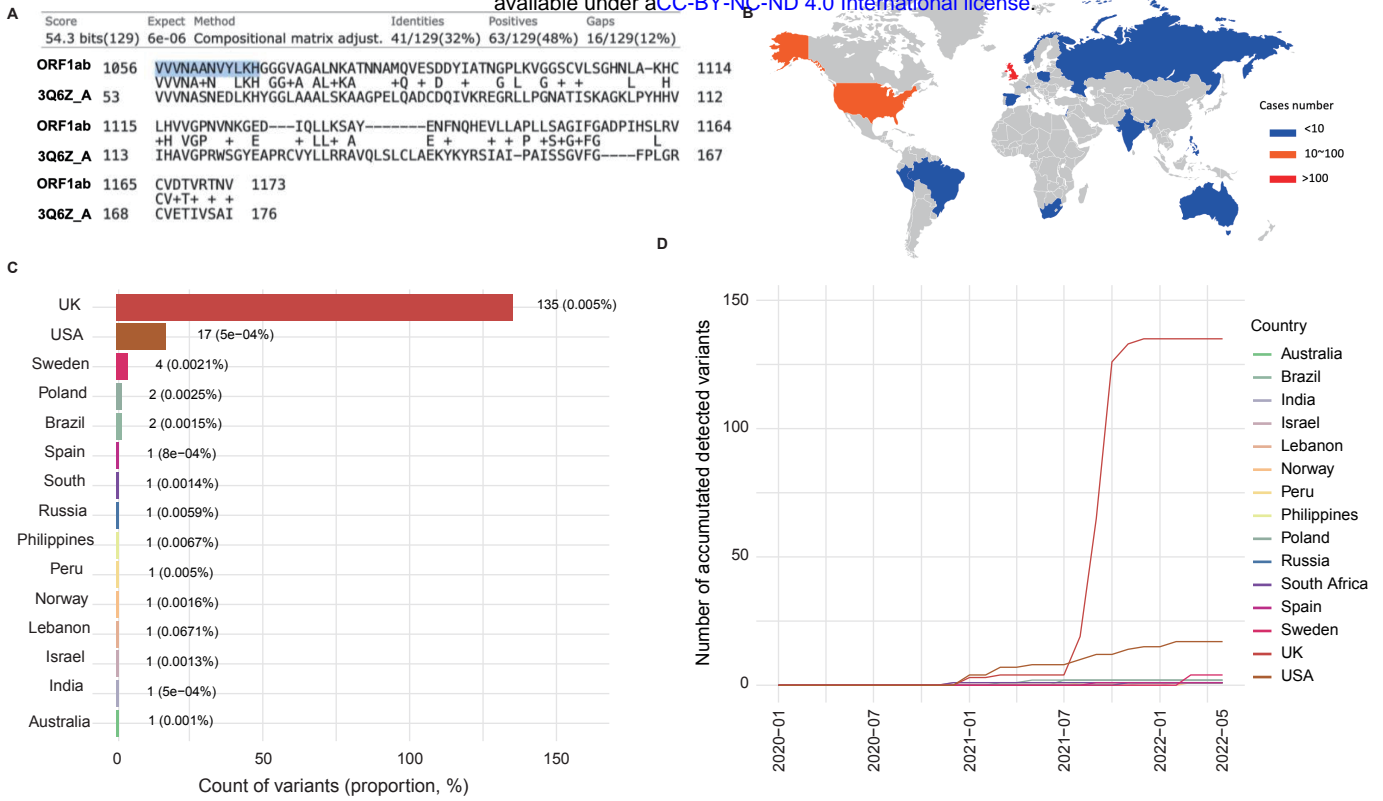

**Figure 2. Sequence analysis of variants bearing OFR1ab<sup>A1061S</sup> substitution.**

bioRxiv preprint doi: <https://doi.org/10.1101/2022.05.16.491922>; this version posted May 23, 2022. The copyright holder for this preprint (which was not certified by peer review) is the author/funder, who has granted bioRxiv a license to display the preprint in perpetuity. It is made available under a [CC-BY-NC-ND 4.0 International license](https://creativecommons.org/licenses/by-nc-nd/4.0/).

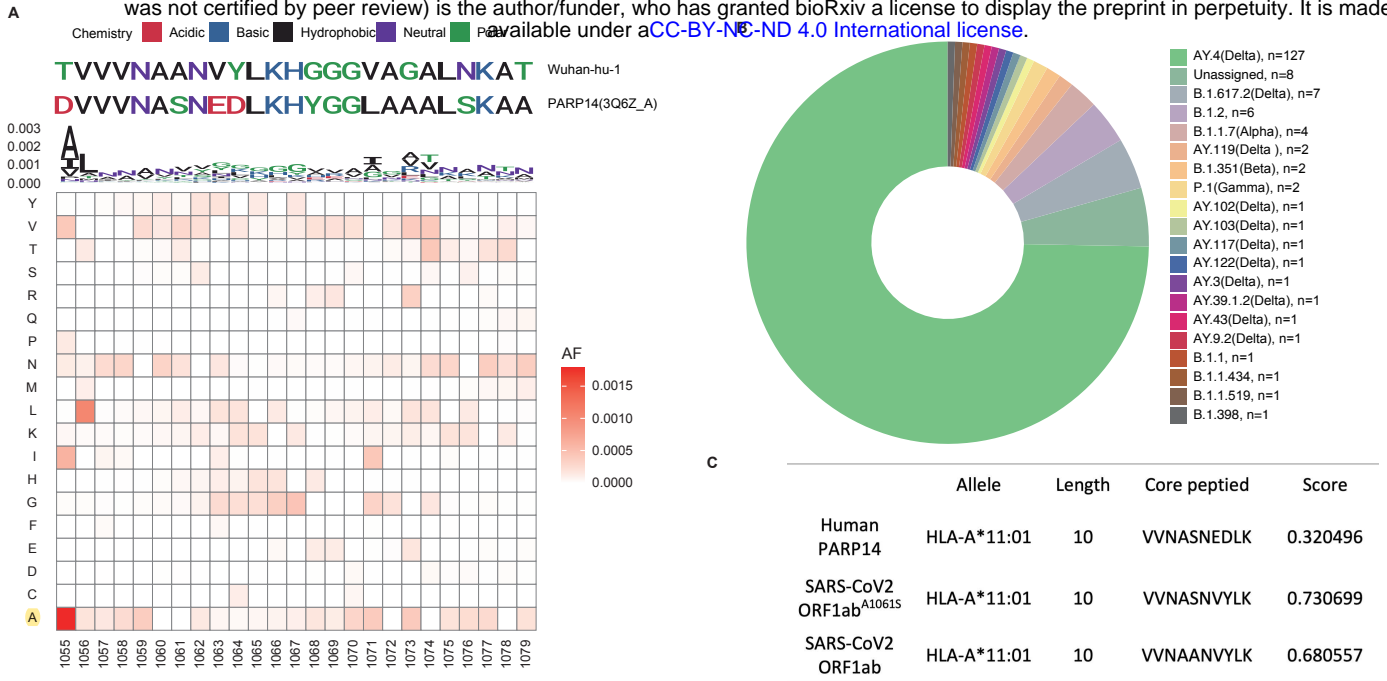

Table 1. Mutation frequency in SARS-CoV-2 ORF1ab<sup>1055-1079</sup> as compared to wuhan\_hu\_1  
 bioRxiv preprint doi: <https://doi.org/10.1101/2022.05.16.491922>; this version posted May 25, 2022. The copyright holder for this preprint (which was not certified by peer review) is the author/funder, who has granted bioRxiv a license to display the preprint in perpetuity. It is made available under aCC-BY-NC-ND 4.0 International license.

| position | composite | allele_frequ | available under a | position | composite | allele_frequ | position | composite | allele_frequ |
|----------|-----------|--------------|-------------------|----------|-----------|--------------|----------|-----------|--------------|
| 1055     | T         | 0.9968422    |                   | 1063     | Q         | 1.25E-06     | 1071     | Y         | 2.69E-06     |
| 1055     | A         | 0.0017836    |                   | 1063     | S         | 9.60E-07     | 1071     | S         | 2.50E-06     |
| 1055     | I         | 6.00E-04     |                   | 1063     | C         | 7.68E-07     | 1071     | P         | 1.15E-06     |
| 1055     | V         | 4.14E-04     |                   | 1063     | M         | 5.76E-07     | 1071     | C         | 9.60E-08     |
| 1055     | P         | 1.35E-04     |                   | 1063     | P         | 3.84E-07     | 1072     | A         | 0.9993339    |
| 1055     | N         | 1.26E-04     |                   | 1063     | R         | 9.60E-08     | 1072     | G         | 1.94E-04     |
| 1055     | K         | 4.59E-05     |                   | 1064     | Y         | 0.9989918    | 1072     | V         | 1.60E-04     |
| 1055     | G         | 2.19E-05     |                   | 1064     | G         | 2.14E-04     | 1072     | N         | 1.20E-04     |
| 1055     | Y         | 1.39E-05     |                   | 1064     | K         | 1.91E-04     | 1072     | K         | 6.73E-05     |
| 1055     | L         | 1.06E-05     |                   | 1064     | L         | 1.80E-04     | 1072     | L         | 4.22E-05     |
| 1055     | H         | 2.78E-06     |                   | 1064     | V         | 1.52E-04     | 1072     | T         | 3.10E-05     |
| 1055     | S         | 1.15E-06     |                   | 1064     | C         | 1.09E-04     | 1072     | E         | 1.58E-05     |
| 1055     | M         | 1.06E-06     |                   | 1064     | H         | 7.22E-05     | 1072     | H         | 1.01E-05     |
| 1055     | R         | 8.64E-07     |                   | 1064     | A         | 4.22E-05     | 1072     | S         | 7.68E-06     |
| 1055     | D         | 3.84E-07     |                   | 1064     | N         | 2.35E-05     | 1072     | Y         | 6.05E-06     |
| 1055     | Q         | 1.92E-07     |                   | 1064     | I         | 1.21E-05     | 1072     | D         | 3.07E-06     |
| 1055     | E         | 9.60E-08     |                   | 1064     | D         | 2.98E-06     | 1072     | Q         | 3.07E-06     |
| 1056     | V         | 0.9983827    |                   | 1064     | M         | 2.69E-06     | 1072     | I         | 2.69E-06     |
| 1056     | L         | 0.0010483    |                   | 1064     | S         | 2.40E-06     | 1072     | M         | 2.30E-06     |
| 1056     | A         | 1.82E-04     |                   | 1064     | T         | 1.15E-06     | 1072     | P         | 1.06E-06     |
| 1056     | T         | 1.32E-04     |                   | 1064     | E         | 9.60E-07     | 1072     | C         | 9.60E-08     |
| 1056     | M         | 1.05E-04     |                   | 1064     | Q         | 5.76E-07     | 1073     | G         | 0.9982889    |
| 1056     | N         | 8.86E-05     |                   | 1064     | F         | 3.84E-07     | 1073     | A         | 3.97E-04     |
| 1056     | K         | 2.53E-05     |                   | 1064     | P         | 9.60E-08     | 1073     | V         | 3.79E-04     |
| 1056     | G         | 1.90E-05     |                   | 1065     | L         | 0.9991379    | 1073     | R         | 3.39E-04     |
| 1056     | Y         | 8.16E-06     |                   | 1065     | G         | 2.15E-04     | 1073     | L         | 1.80E-04     |
| 1056     | H         | 2.78E-06     |                   | 1065     | K         | 1.91E-04     | 1073     | E         | 1.62E-04     |
| 1056     | I         | 1.44E-06     |                   | 1065     | H         | 1.80E-04     | 1073     | K         | 1.06E-04     |
| 1056     | P         | 1.34E-06     |                   | 1065     | Y         | 1.30E-04     | 1073     | N         | 6.81E-05     |
| 1056     | E         | 1.15E-06     |                   | 1065     | A         | 5.36E-05     | 1073     | T         | 4.62E-05     |
| 1056     | Q         | 9.60E-07     |                   | 1065     | V         | 4.85E-05     | 1073     | M         | 7.78E-06     |
| 1056     | D         | 7.68E-07     |                   | 1065     | N         | 1.18E-05     | 1073     | I         | 6.05E-06     |
| 1056     | S         | 1.92E-07     |                   | 1065     | F         | 7.01E-06     | 1073     | S         | 5.57E-06     |
| 1057     | V         | 0.9994063    |                   | 1065     | T         | 6.34E-06     | 1073     | H         | 5.38E-06     |
| 1057     | N         | 2.45E-04     |                   | 1065     | M         | 5.95E-06     | 1073     | D         | 2.88E-06     |
| 1057     | A         | 1.52E-04     |                   | 1065     | D         | 4.80E-06     | 1073     | Q         | 2.40E-06     |
| 1057     | I         | 6.82E-05     |                   | 1065     | I         | 2.88E-06     | 1073     | P         | 1.73E-06     |
| 1057     | F         | 3.20E-05     |                   | 1065     | Q         | 2.69E-06     | 1073     | Y         | 1.25E-06     |
| 1057     | K         | 2.76E-05     |                   | 1065     | P         | 1.92E-06     | 1073     | C         | 8.64E-07     |
| 1057     | Y         | 1.79E-05     |                   | 1065     | E         | 1.34E-06     | 1074     | A         | 0.9984284    |
| 1057     | G         | 1.67E-05     |                   | 1065     | S         | 7.68E-07     | 1074     | T         | 4.19E-04     |
| 1057     | L         | 1.57E-05     |                   | 1065     | C         | 9.60E-08     | 1074     | V         | 4.11E-04     |
| 1057     | H         | 7.68E-06     |                   | 1066     | K         | 0.9990457    | 1074     | N         | 2.43E-04     |
| 1057     | D         | 3.65E-06     |                   | 1066     | G         | 3.42E-04     | 1074     | L         | 1.80E-04     |
| 1057     | Q         | 2.59E-06     |                   | 1066     | H         | 1.78E-04     | 1074     | G         | 1.56E-04     |
| 1057     | P         | 2.21E-06     |                   | 1066     | L         | 1.33E-04     | 1074     | K         | 5.30E-05     |
| 1057     | T         | 1.44E-06     |                   | 1066     | A         | 7.36E-05     | 1074     | S         | 4.79E-05     |
| 1057     | S         | 8.64E-07     |                   | 1066     | V         | 6.61E-05     | 1074     | D         | 3.95E-05     |
| 1057     | E         | 4.80E-07     |                   | 1066     | R         | 5.33E-05     | 1074     | Q         | 7.68E-06     |
| 1057     | M         | 2.88E-07     |                   | 1066     | E         | 4.19E-05     | 1074     | M         | 4.13E-06     |
| 1058     | V         | 0.9992974    |                   | 1066     | N         | 3.49E-05     | 1074     | E         | 2.88E-06     |
| 1058     | N         | 2.93E-04     |                   | 1066     | T         | 1.23E-05     | 1074     | Y         | 2.21E-06     |
| 1058     | A         | 2.39E-04     |                   | 1066     | Q         | 6.15E-06     | 1074     | P         | 1.44E-06     |
| 1058     | Y         | 4.56E-05     |                   | 1066     | I         | 5.28E-06     | 1074     | C         | 1.15E-06     |

|      |   |           |      |   |           |      |   |           |
|------|---|-----------|------|---|-----------|------|---|-----------|
| 1058 | I | 3.90E-05  | 1066 | D | 2.50E-06  | 1074 | I | 9.60E-07  |
| 1058 | J | 0.000105  | 1066 | S | 0.025000  | 1074 | L | 0.9991155 |
| 1058 | K | 2.22E-05  | 1066 | M | 1.06E-06  | 1075 | N | 2.88E-04  |
| 1058 | G | 1.38E-05  | 1066 | P | 9.60E-07  | 1075 | K | 1.91E-04  |
| 1058 | P | 9.22E-06  | 1067 | H | 0.9989511 | 1075 | A | 1.90E-04  |
| 1058 | H | 4.03E-06  | 1067 | G | 4.45E-04  | 1075 | T | 1.11E-04  |
| 1058 | T | 3.74E-06  | 1067 | Y | 1.53E-04  | 1075 | V | 2.33E-05  |
| 1058 | D | 1.25E-06  | 1067 | K | 1.37E-04  | 1075 | I | 1.99E-05  |
| 1058 | E | 1.15E-06  | 1067 | V | 1.23E-04  | 1075 | G | 1.69E-05  |
| 1058 | M | 1.15E-06  | 1067 | A | 9.54E-05  | 1075 | D | 1.44E-05  |
| 1058 | Q | 2.88E-07  | 1067 | Q | 3.48E-05  | 1075 | M | 8.74E-06  |
| 1058 | F | 1.92E-07  | 1067 | N | 3.27E-05  | 1075 | S | 6.05E-06  |
| 1058 | S | 1.92E-07  | 1067 | L | 1.06E-05  | 1075 | Q | 4.13E-06  |
| 1059 | N | 0.9991649 | 1067 | E | 3.36E-06  | 1075 | F | 3.55E-06  |
| 1059 | A | 3.72E-04  | 1067 | T | 3.17E-06  | 1075 | P | 3.26E-06  |
| 1059 | V | 2.44E-04  | 1067 | R | 2.98E-06  | 1075 | E | 2.40E-06  |
| 1059 | Y | 6.04E-05  | 1067 | D | 2.11E-06  | 1075 | C | 9.60E-07  |
| 1059 | L | 4.78E-05  | 1067 | M | 2.11E-06  | 1075 | Y | 8.64E-07  |
| 1059 | K | 2.83E-05  | 1067 | P | 1.54E-06  | 1075 | H | 2.88E-07  |
| 1059 | T | 2.24E-05  | 1067 | S | 1.06E-06  | 1076 | N | 0.9992106 |
| 1059 | G | 1.95E-05  | 1067 | I | 8.64E-07  | 1076 | A | 2.37E-04  |
| 1059 | S | 1.50E-05  | 1067 | C | 5.76E-07  | 1076 | K | 1.81E-04  |
| 1059 | P | 1.01E-05  | 1068 | G | 0.9991909 | 1076 | L | 1.30E-04  |
| 1059 | H | 8.83E-06  | 1068 | V | 2.00E-04  | 1076 | S | 8.46E-05  |
| 1059 | E | 2.78E-06  | 1068 | A | 1.65E-04  | 1076 | T | 4.67E-05  |
| 1059 | D | 1.82E-06  | 1068 | H | 1.29E-04  | 1076 | V | 2.83E-05  |
| 1059 | Q | 1.15E-06  | 1068 | E | 1.25E-04  | 1076 | D | 2.56E-05  |
| 1059 | M | 8.64E-07  | 1068 | R | 1.04E-04  | 1076 | M | 1.76E-05  |
| 1059 | I | 5.76E-07  | 1068 | N | 2.52E-05  | 1076 | G | 1.12E-05  |
| 1059 | C | 9.60E-08  | 1068 | L | 2.01E-05  | 1076 | Q | 8.74E-06  |
| 1060 | A | 0.9992057 | 1068 | D | 1.10E-05  | 1076 | E | 7.87E-06  |
| 1060 | N | 3.11E-04  | 1068 | Y | 9.89E-06  | 1076 | Y | 5.38E-06  |
| 1060 | V | 1.39E-04  | 1068 | K | 5.76E-06  | 1076 | C | 2.59E-06  |
| 1060 | Y | 1.08E-04  | 1068 | T | 4.90E-06  | 1076 | H | 1.15E-06  |
| 1060 | L | 6.06E-05  | 1068 | S | 2.88E-06  | 1076 | I | 9.60E-07  |
| 1060 | K | 4.70E-05  | 1068 | Q | 2.21E-06  | 1076 | P | 6.72E-07  |
| 1060 | T | 3.67E-05  | 1068 | I | 1.54E-06  | 1077 | K | 0.9989977 |
| 1060 | G | 3.14E-05  | 1068 | P | 1.15E-06  | 1077 | N | 3.68E-04  |
| 1060 | S | 2.14E-05  | 1068 | M | 7.68E-07  | 1077 | A | 2.51E-04  |
| 1060 | H | 1.76E-05  | 1068 | C | 2.88E-07  | 1077 | T | 1.86E-04  |
| 1060 | D | 1.08E-05  | 1069 | G | 0.9992562 | 1077 | M | 5.09E-05  |
| 1060 | P | 4.42E-06  | 1069 | V | 2.04E-04  | 1077 | R | 3.22E-05  |
| 1060 | E | 3.07E-06  | 1069 | R | 1.57E-04  | 1077 | E | 2.16E-05  |
| 1060 | M | 1.73E-06  | 1069 | E | 1.25E-04  | 1077 | V | 1.95E-05  |
| 1060 | Q | 8.64E-07  | 1069 | A | 1.16E-04  | 1077 | G | 1.88E-05  |
| 1060 | I | 4.80E-07  | 1069 | L | 5.56E-05  | 1077 | Q | 1.76E-05  |
| 1060 | C | 9.60E-08  | 1069 | N | 2.47E-05  | 1077 | Y | 1.06E-05  |
| 1061 | A | 0.9990999 | 1069 | K | 1.15E-05  | 1077 | S | 8.93E-06  |
| 1061 | V | 2.67E-04  | 1069 | Y | 1.10E-05  | 1077 | I | 5.76E-06  |
| 1061 | N | 1.92E-04  | 1069 | I | 1.02E-05  | 1077 | D | 5.19E-06  |
| 1061 | T | 1.18E-04  | 1069 | T | 8.83E-06  | 1077 | P | 2.88E-06  |
| 1061 | L | 1.10E-04  | 1069 | S | 6.34E-06  | 1077 | L | 2.50E-06  |
| 1061 | K | 6.26E-05  | 1069 | M | 5.28E-06  | 1077 | C | 2.88E-07  |
| 1061 | H | 4.57E-05  | 1069 | D | 3.36E-06  | 1077 | H | 9.60E-08  |
| 1061 | Y | 4.02E-05  | 1069 | P | 2.59E-06  | 1078 | A | 0.9990958 |
| 1061 | G | 3.40E-05  | 1069 | Q | 8.64E-07  | 1078 | T | 2.55E-04  |
| 1061 | S | 1.71E-05  | 1069 | H | 6.72E-07  | 1078 | N | 2.23E-04  |
| 1061 | D | 4.13E-06  |      |   |           |      |   |           |

bioRxiv preprint doi: <https://doi.org/10.1101/2022.05.06.491922>; this version posted May 23, 2022. The copyright holder for this preprint (which was not certified by peer review) is the author/funder, who has granted bioRxiv a license to display the preprint in perpetuity. It is made available under aCC-BY-NC-ND 4.0 International license.

bioRxiv preprint doi: <https://doi.org/10.1101/2022.05.06.491922>; this version posted May 23, 2022. The copyright holder for this preprint (which was not certified by peer review) is the author/funder, who has granted bioRxiv a license to display the preprint in perpetuity. It is made available under aCC-BY-NC-ND 4.0 International license.

|      |   |           |      |   |           |      |   |           |
|------|---|-----------|------|---|-----------|------|---|-----------|
| 1061 | I | 3.36E-06  | 1069 | C | 9.60E-08  | 1078 | K | 1.29E-04  |
| 1061 | Q | 1.82E-06  | 1070 | A | 2.98E-04  | 1078 | Q | 4.56E-05  |
| 1061 | M | 7.68E-07  | 1070 | V | 1.95E-04  | 1078 | S | 2.14E-05  |
| 1061 | P | 4.80E-07  | 1070 | L | 7.35E-05  | 1078 | D | 1.86E-05  |
| 1061 | C | 9.60E-08  | 1070 | N | 5.66E-05  | 1078 | P | 1.56E-05  |
| 1062 | N | 0.9990169 | 1070 | C | 5.19E-05  | 1078 | G | 1.39E-05  |
| 1062 | V | 2.17E-04  | 1070 | S | 4.82E-05  | 1078 | I | 9.12E-06  |
| 1062 | Y | 1.80E-04  | 1070 | D | 4.03E-05  | 1078 | L | 8.83E-06  |
| 1062 | A | 1.45E-04  | 1070 | K | 2.84E-05  | 1078 | E | 8.74E-06  |
| 1062 | S | 1.25E-04  | 1070 | M | 9.12E-06  | 1078 | Y | 2.98E-06  |
| 1062 | K | 1.08E-04  | 1070 | T | 6.63E-06  | 1078 | H | 1.34E-06  |
| 1062 | G | 7.45E-05  | 1070 | Q | 5.47E-06  | 1078 | C | 1.15E-06  |
| 1062 | H | 6.12E-05  | 1070 | Y | 4.80E-06  | 1079 | T | 0.9991392 |
| 1062 | L | 4.96E-05  | 1070 | H | 2.40E-06  | 1079 | N | 3.63E-04  |
| 1062 | T | 1.19E-05  | 1070 | E | 2.11E-06  | 1079 | A | 1.99E-04  |
| 1062 | D | 7.11E-06  | 1070 | I | 1.34E-06  | 1079 | M | 1.05E-04  |
| 1062 | E | 1.06E-06  | 1070 | P | 5.76E-07  | 1079 | Q | 5.98E-05  |
| 1062 | M | 1.06E-06  | 1070 | R | 3.84E-07  | 1079 | V | 5.00E-05  |
| 1062 | Q | 9.60E-07  | 1070 | F | 9.60E-08  | 1079 | E | 1.76E-05  |
| 1062 | I | 4.80E-07  | 1071 | V | 0.9985597 | 1079 | L | 1.56E-05  |
| 1062 | P | 9.60E-08  | 1071 | I | 4.22E-04  | 1079 | S | 1.38E-05  |
| 1063 | V | 0.9988616 | 1071 | A | 3.91E-04  | 1079 | D | 1.18E-05  |
| 1063 | G | 2.42E-04  | 1071 | G | 3.14E-04  | 1079 | G | 1.03E-05  |
| 1063 | Y | 1.90E-04  | 1071 | L | 1.10E-04  | 1079 | I | 4.90E-06  |
| 1063 | L | 1.82E-04  | 1071 | N | 7.37E-05  | 1079 | K | 4.90E-06  |
| 1063 | N | 1.56E-04  | 1071 | K | 6.11E-05  | 1079 | Y | 2.30E-06  |
| 1063 | I | 1.05E-04  | 1071 | F | 1.39E-05  | 1079 | P | 1.44E-06  |
| 1063 | H | 1.05E-04  | 1071 | E | 1.03E-05  | 1079 | C | 1.15E-06  |
| 1063 | A | 5.28E-05  | 1071 | T | 9.60E-06  | 1079 | H | 2.88E-07  |
| 1063 | F | 4.79E-05  | 1071 | Q | 9.22E-06  |      |   |           |
| 1063 | K | 4.74E-05  | 1071 | H | 9.12E-06  |      |   |           |
| 1063 | T | 3.17E-06  | 1071 | D | 7.20E-06  |      |   |           |
| 1063 | E | 1.92E-06  | 1071 | M | 2.88E-06  |      |   |           |
| 1063 | D | 1.44E-06  |      |   |           |      |   |           |
